# Supplementary material for: TRIAMF: A New Method for Delivery of Cas9 Ribonucleoprotein Complex to Human Hematopoietic Stem Cells
Source: PubMed Central journal article supplement (PMC6214993; doi:10.1038/s41598-018-34601-6), 2018-11-02

TRIAMF: A New Method for Delivery of Cas9 Ribonucleoprotein Complex to Human Hematopoietic Stem Cells

Jonathan Yen<sup>1</sup>, Michael Fiorino<sup>2</sup>, Yi Liu<sup>1</sup>, Steve Paula<sup>1</sup>, Scott Clarkson<sup>1</sup>, Lisa Quinn<sup>3</sup>, William R. Tschantz<sup>3</sup>, Heath Klock<sup>4</sup>, Ning Guo<sup>1</sup>, Carsten Russ<sup>1</sup>, Vionnie W.C. Yu<sup>1</sup>, Craig Mickanin<sup>1</sup>, Susan C. Stevenson<sup>1</sup>, Cameron Lee<sup>5</sup>, and Yi Yang<sup>1,6</sup>

Figure S1. Representative distribution of diameters of untreated and 2-day post TRIAMF treated cells measured by Vi-CELL XR cell counter. Representative distribution of the forward scatter of the CD34+ and CD34+/CD90+ cells that were untreated, treated with TRIAMF in the absence of RNP (TRIAMF Mock) or presence of RNP (TRIAMF+RNP).

Figure S2. B2M knockout efficiency in total, CD34+ or CD34+/CD90+ populations of untreated, mock treated (TRIAMF Mock), and TRIAMF+RNP treated HSPCs.

Figure S3. B2M knockout efficiency determined by NGS as a function of (a) membrane pore diameter; (b) applied pressure; (c) RNP concentration and (d) cell density (n=6, 3 donors with duplicate of each donor). (e) B2M knockout efficiency remained the same with further increased cell density from  $10^8$  to  $2 \times 10^8$  cells/ml in 50  $\mu$ l volume processed by TRIAMF using 25  $\mu$ M of RNP, 7  $\mu$ m thick membrane with 8  $\mu$ m pore diameter under 5 PSI nitrogen pressure (n=2). The samples are identical to the ones in Fig.1. \*\*\* p < 0.001, \*\* p < 0.01, one-way analysis of variance (ANOVA) and Tukey's multiple comparison test.

Figure S4. HSPC recovery rates after TRIAMF or electroporation in the absence of RNP.  $5 \times 10^4$  viable cells seeded 48 hours post treatment and expanded for 7 days. Percentage of CD34+ and CD34+/CD90+ are shown in (a) and the total cell number and the number of either CD34+ or CD34+/CD90+ cells are shown in (b). n=4 single donor, biological duplicate with technical duplicate each, \*\* p < 0.01, one-way analysis of variance (ANOVA) and Tukey's multiple comparison test. Bars represent standard deviation.

Figure S5. Representative gating scheme of CD235a+/CD71<sup>-/low</sup> cells after 3 weeks erythroid differentiation/maturation in experimental groups used in Fig. 2 and 3.

Figure S6. B2M knockout efficiency as determined by NGS (a) and cell recovery (b) of untreated, mock electroporated (Neon Mock) and RNP electroporated (Neon+RNP) HSPCs. 0.14 million of ex vivo expanded HSPCs were mixed with 1  $\mu$ M RNP, brought to 10  $\mu$ l final volume with Buffer T and electroporated with the Neon electroporator using the same conditions as in Fig. S4.

S1

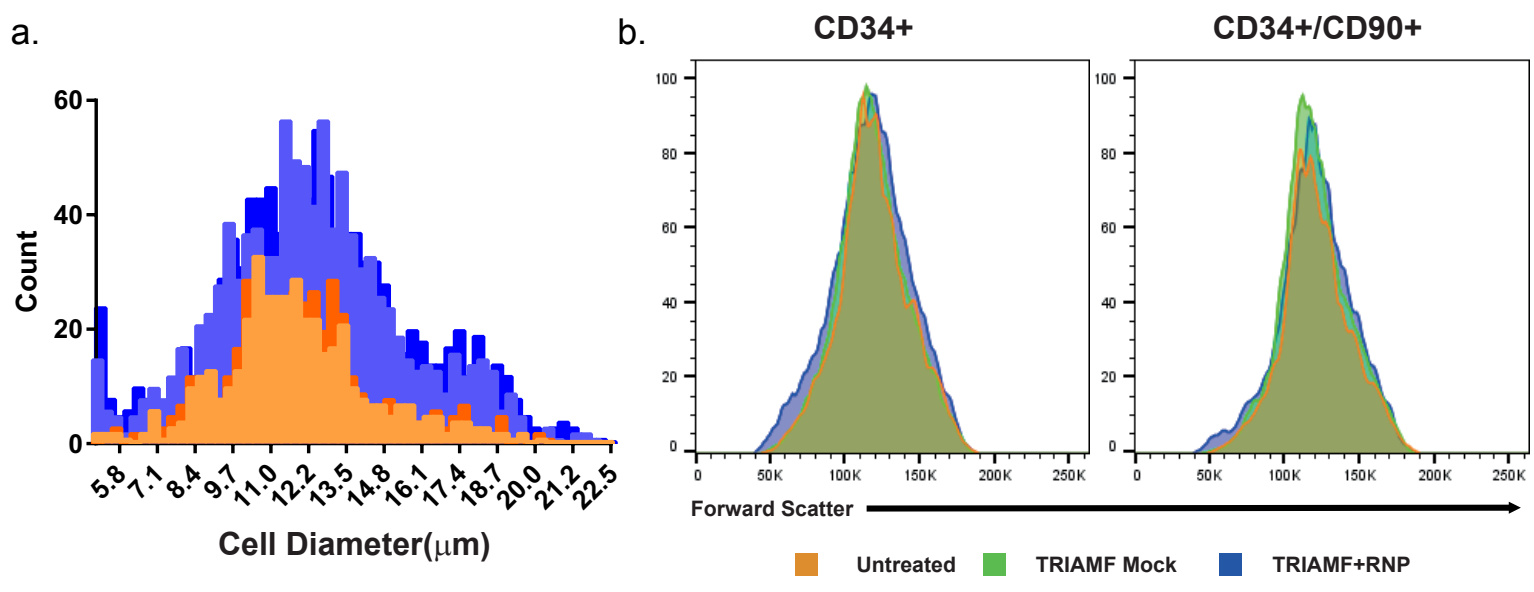

S2

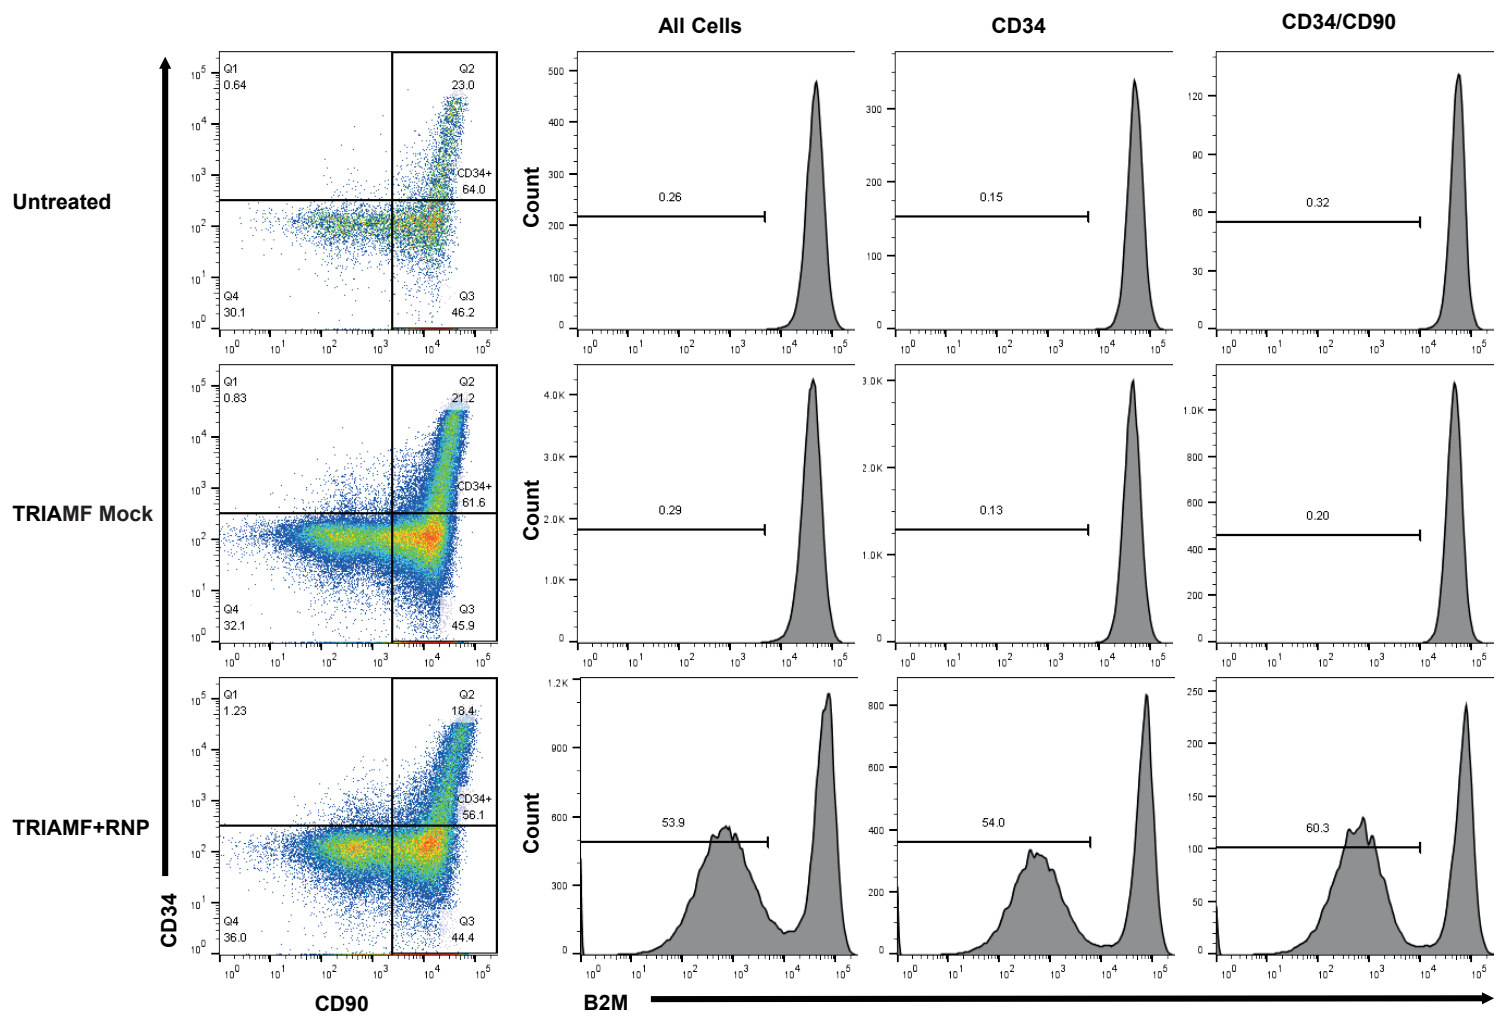

S3

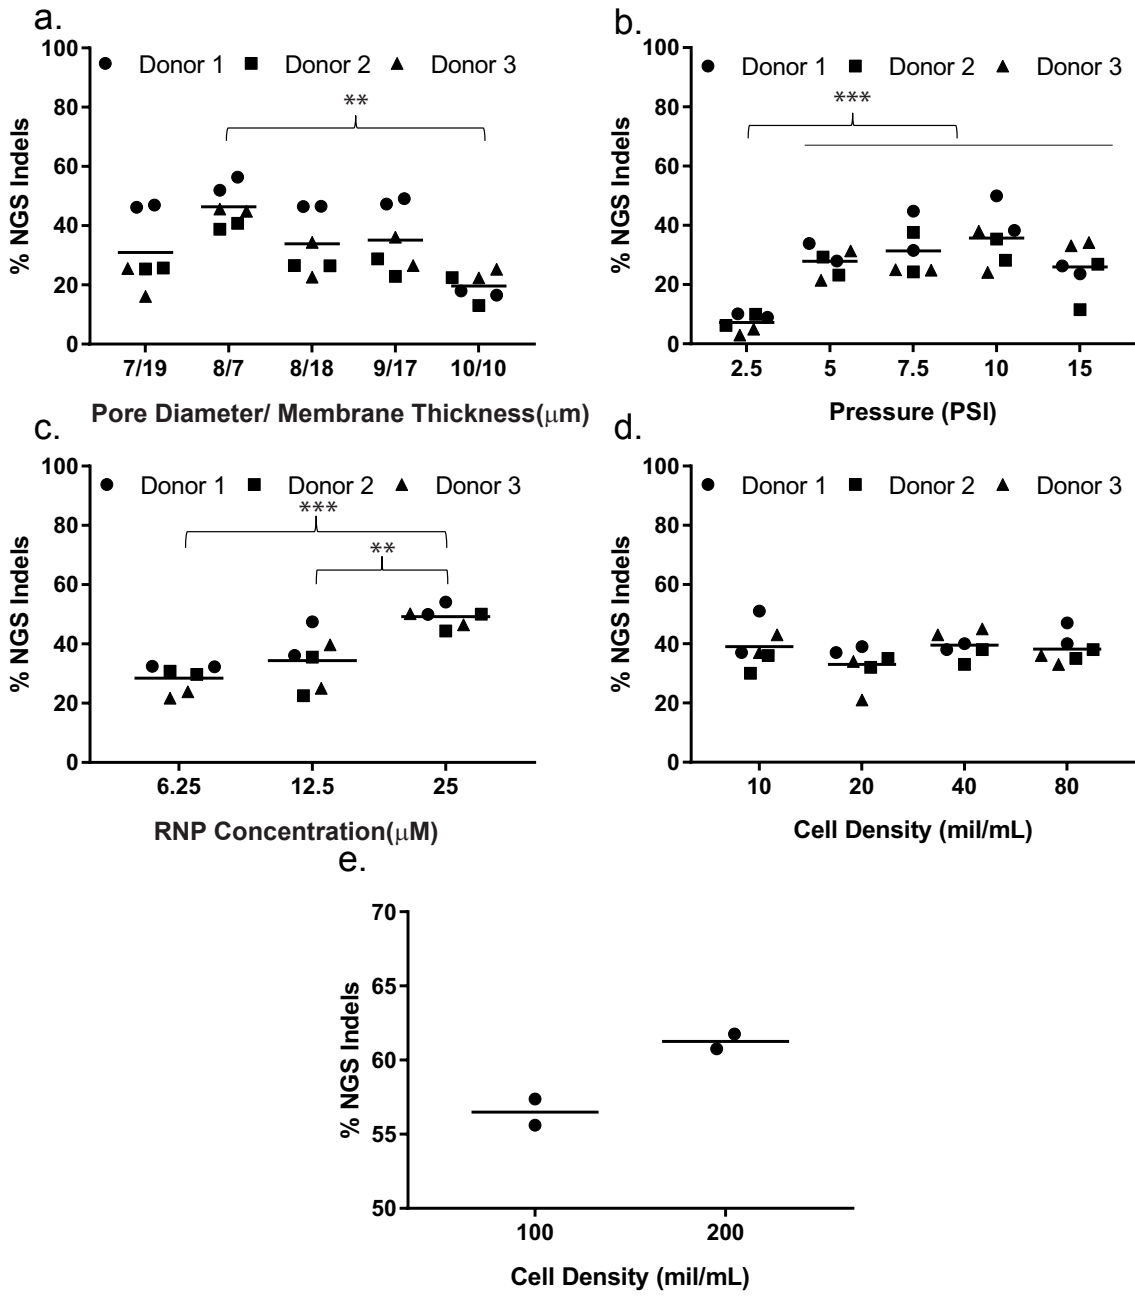

S4

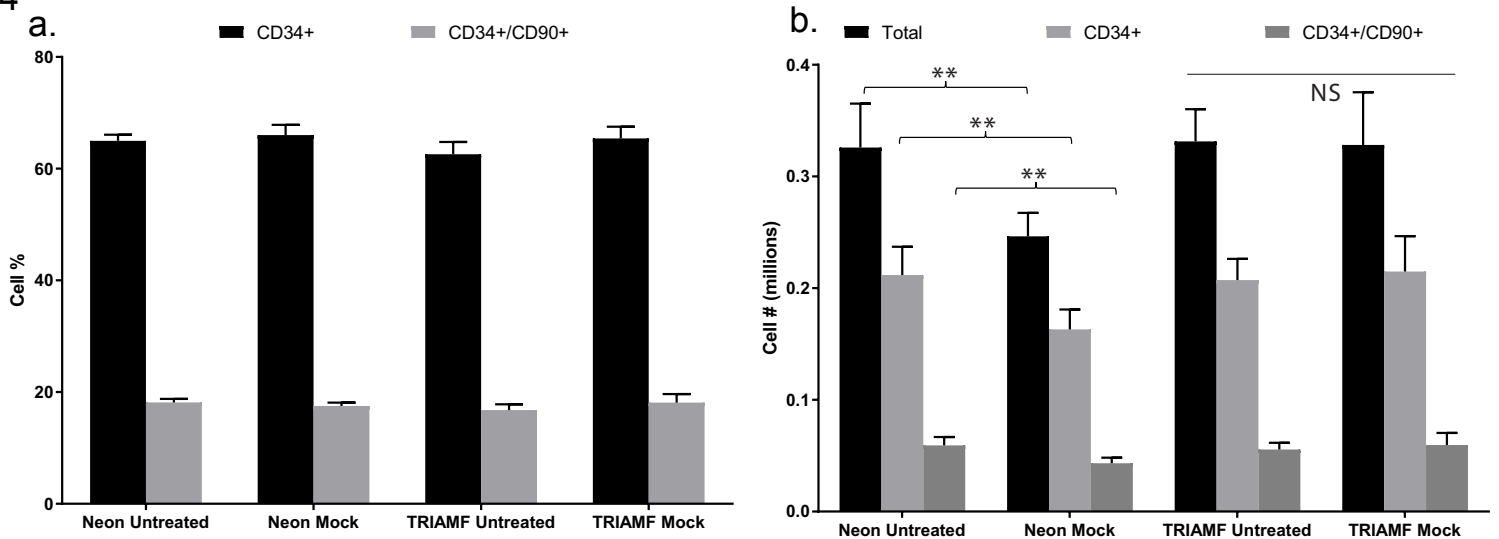

S5

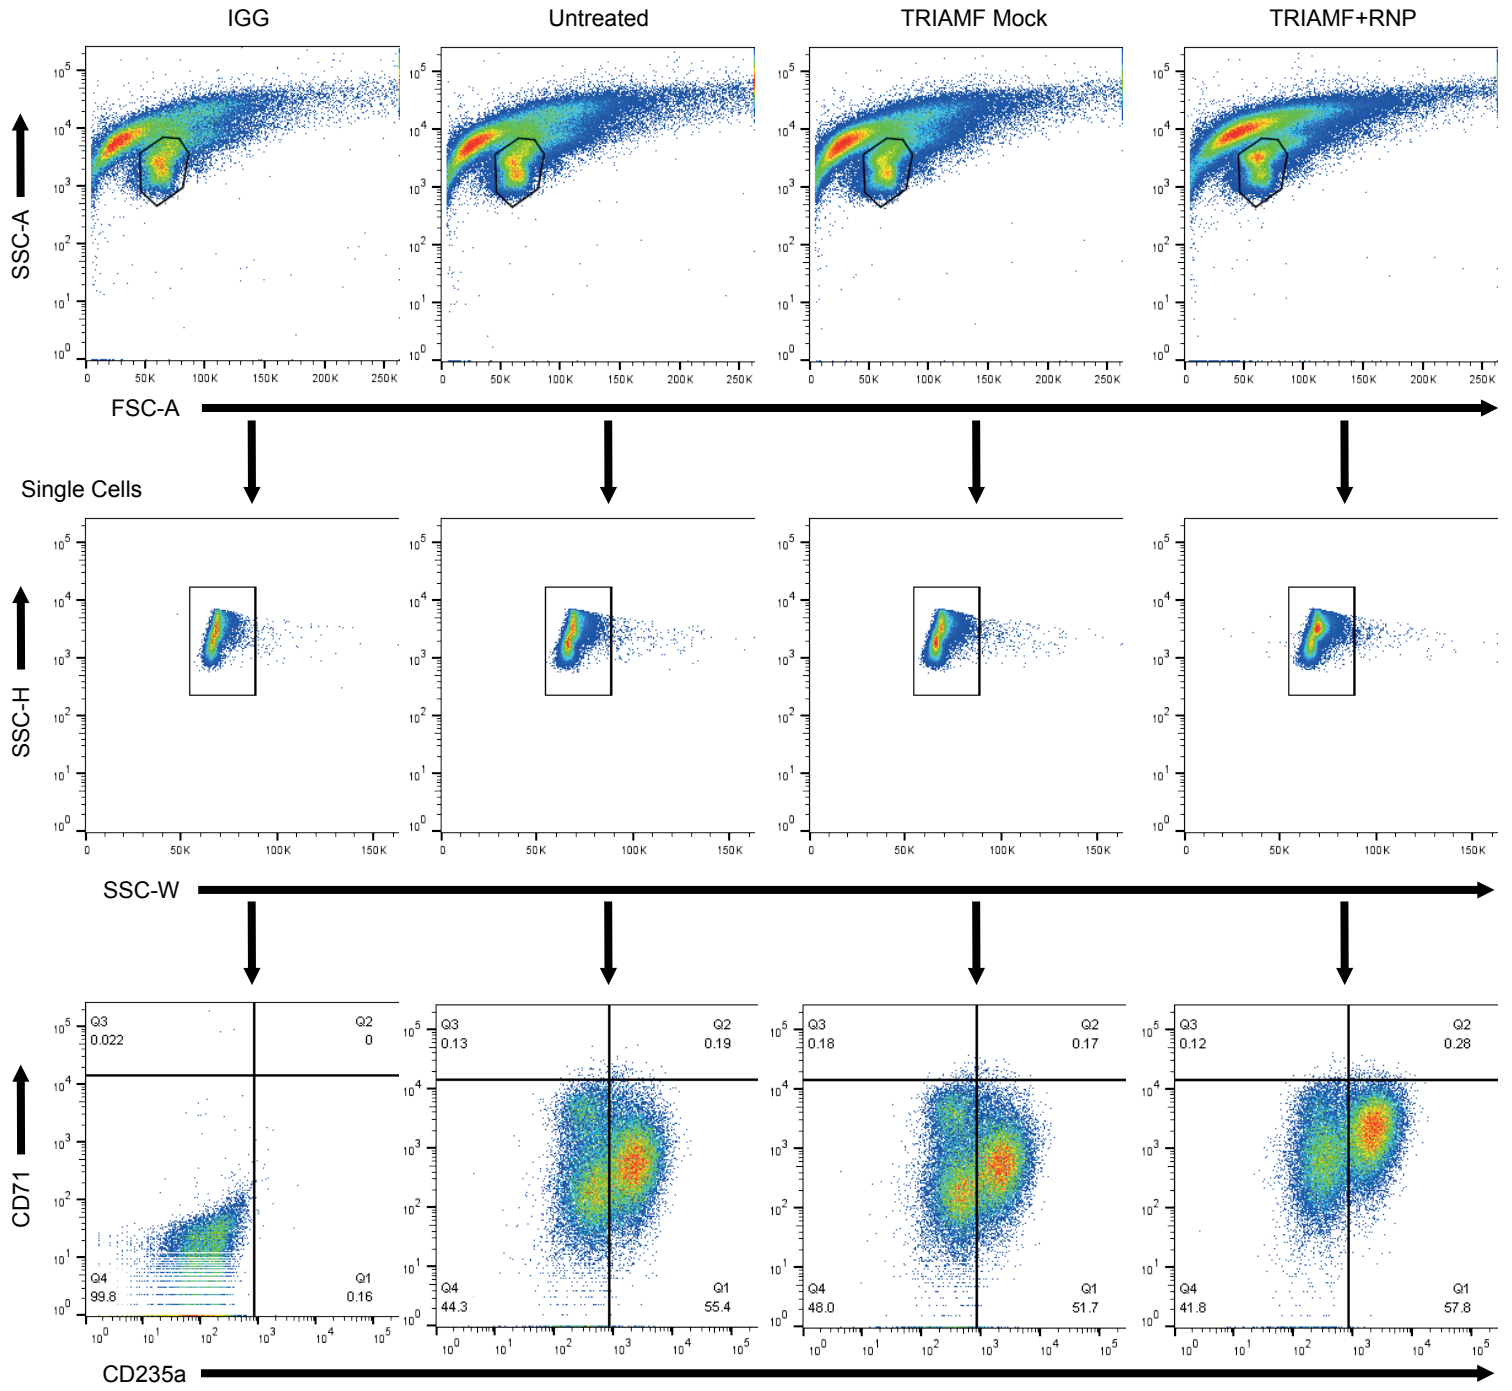

S6

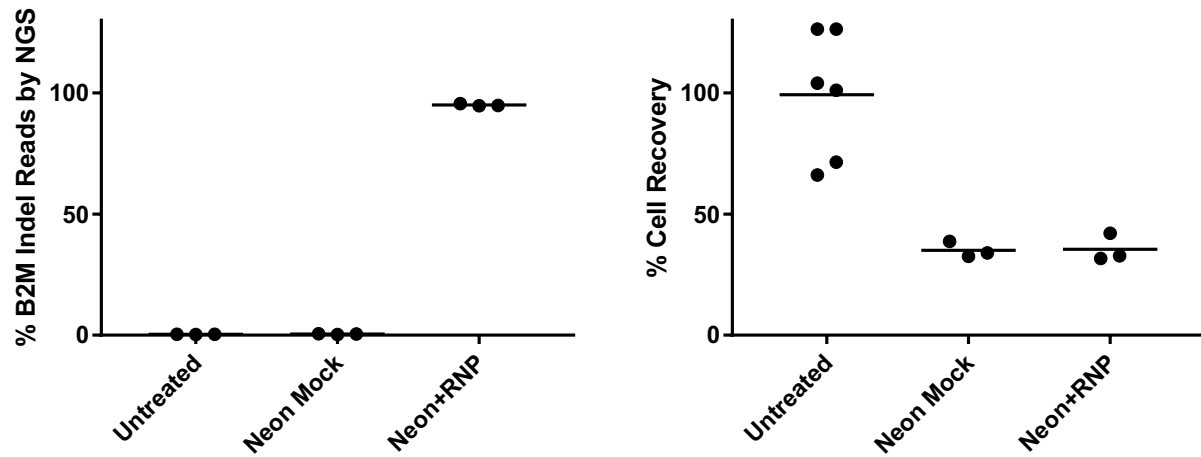

Supplement: 41598_2018_34601_MOESM1_ESM.pdf [file 41598_2018_34601_MOESM1_ESM.pdf]
